# Supplementary material for: Effects of Tenapanor on Cytochrome P450‐Mediated Drug‐Drug Interactions
Source: PubMed Central journal article supplement — Clin Pharmacol Drug Dev. 2017 Mar 16;6(5):466–75. doi: 10.1002/cpdd.346 (PMC5599994; doi:10.1002/cpdd.346), 2017-03-16

# Effects of Tenapanor on Cytochrome P450-Mediated Drug–Drug Interactions

Susanne Johansson, David P. Rosenbaum, Marie Ahlqvist, Helen Rollison, Mikael Knutsson, Bergur Stefansson, and Marie Elebring

## Supplementary Information

**Supplementary Figure 1.** Effect of tenapanor on the formation of (a) hydroxybupropion (CYP2B6,  $IC_{50}$   $15.4 \pm 7.5 \mu\text{M}$ ) and (b) oxidized nifedipine (CYP3A4/5,  $IC_{50}$   $0.680 \pm 0.157 \mu\text{M}$ ) in human liver microsomes. Three replicates for each experiment are shown.

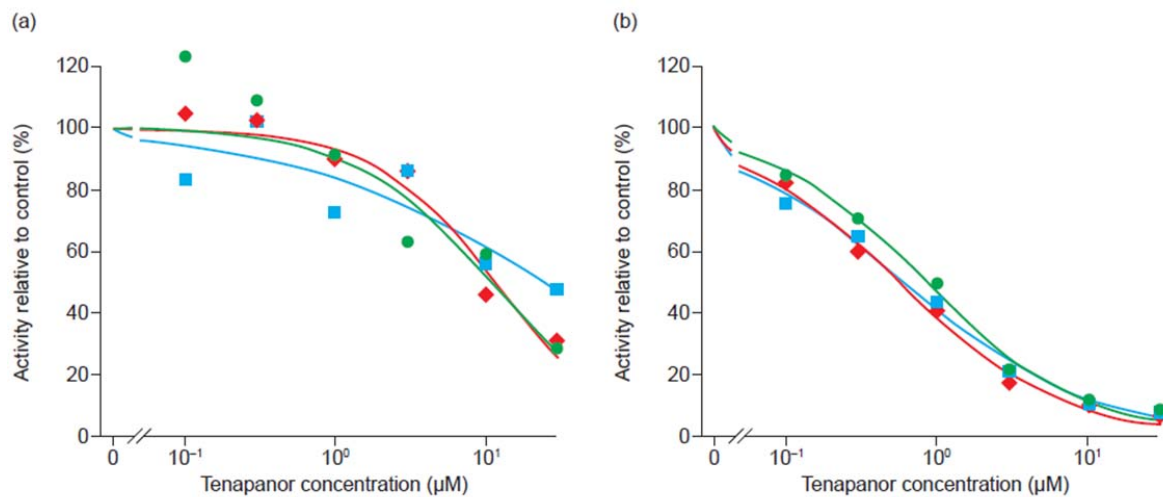

Supplement: CPDD-6-466-s001.pdf [file CPDD-6-466-s001.pdf]
